# Supplementary material for: B cell signatures and tertiary lymphoid structures contribute to outcome in head and neck squamous cell carcinoma
Source: PubMed Central journal article supplement (PMC8184766; doi:10.1038/s41467-021-23355-x), 2021-06-07
Supplement: 41467_2021_23355_MOESM1_ESM.pdf [file 41467_2021_23355_MOESM1_ESM.pdf]

|                              | Healthy PBMCs | Healthy Tonsils | HNSCC      |
|------------------------------|---------------|-----------------|------------|
|                              | N=6           | N=5             | N=27       |
| <b>Demographics</b>          |               |                 |            |
| Median Age                   | 55(29-56)     | 38(28-53)       | 60(15-80)  |
| Sex N (%) Female             | 3(50%)        | 0(0%)           | 6(22.2%)   |
| <b>Tumor p16 Status</b>      |               |                 |            |
| p16+ N (%)                   | N/A           | N/A             | 9(33.3%)   |
| p16- N (%)                   | N/A           | N/A             | 18(66.7%)  |
| NE N (%)                     | N/A           | N/A             | 0(0%)      |
| <b>Site of primary tumor</b> |               |                 |            |
| Tonsil N(%)                  | N/A           | N/A             | 3(11.1%)   |
| Tongue N(%)                  | N/A           | N/A             | 8 (29.6%)  |
| Base of Tongue N(%)          | N/A           | N/A             | 4(14.8%)   |
| Larynx N(%)                  | N/A           | N/A             | 3(11.1%)   |
| Other N(%)                   | N/A           | N/A             | 9(33.3%)   |
| <b>Pathological Staging</b>  |               |                 |            |
| TX N(%)                      | N/A           | N/A             | 1(3.7%)    |
| T0 N(%)                      | N/A           | N/A             | 0(0%)      |
| T1-T2 N(%)                   | N/A           | N/A             | 10(37%)    |
| T3-T4A. N(%)                 | N/A           | N/A             | 15 (55.6%) |
| Unknown N(%)                 | N/A           | N/A             | 1 (3.7%)   |
| <b>Pathological Node</b>     |               |                 |            |
| NX N(%)                      | N/A           | N/A             | 0 (0%)     |
| N0 N(%)                      | N/A           | N/A             | 8(29.6%)   |
| N1-N2 N(%)                   | N/A           | N/A             | 6(22.2%)   |
| N2A-N2C N(%)                 | N/A           | N/A             | 10(37.0%)  |
| N3-N3B N(%)                  | N/A           | N/A             | 2(7.4%)    |
| Unknown N(%)                 | N/A           | N/A             | 1(3.7%)    |
| <b>Tobacco Use</b>           |               |                 |            |
| Yes N(%)                     | 0(0%)         | 1(20%)          | 14(52%)    |
| No N(%)                      | 4(66.7%)      | 1(20%)          | 8(29.6%)   |
| Former N(%)                  | 2(33.3%)      | 3(60%)          | 4(14.8%)   |
| <b>ETOH use</b>              |               |                 |            |
| Never N(%)                   | 0(0%)         | 0(0%)           | 0(0%)      |
| Yes N(%)                     | 2(33.3%)      | 0(40%)          | 9(33.3%)   |
| No N(%)                      | 1(16.7)       | 2(40%)          | 11(25.6%)  |
| Occasional N(%)              | 3(50%)        | 1(20%)          | 4(14.8%)   |
| Former N(%)                  | 0(0%)         | 0(0%)           | 0(0%)      |
| Unknown N(%)                 | 0(0%)         | 2(40%)          | 3(11.1%)   |

**Supplementary Table 1: Clinical characteristics of prospective patient cohort for single-cell RNAseq and immunofluorescence (Cohort 1)**

|                              | Tonsils   | HNSCC      |
|------------------------------|-----------|------------|
|                              | N=24      | N=43       |
| <b>Demographics</b>          |           |            |
| Median Age                   | 31(18-52) | 57 (36-81) |
| Sex N (%) Female             | 13(54.2%) | 13(30.2%)  |
| <b>Tumor p16 Status</b>      |           |            |
| p16+ N (%)                   | N/A       | 12(28%)    |
| p16- N (%)                   | N/A       | 8 (18.6%)  |
| NE N (%)                     | N/A       | 23(53.4%)  |
| <b>Site of primary tumor</b> |           |            |
| Tonsil N(%)                  | N/A       | 7(16.3%)   |
| Tongue N(%)                  | N/A       | 8(18.6%)   |
| Base of Tongue N(%)          | N/A       | 6(13.9%)   |
| Larynx N(%)                  | N/A       | 7(16.3%)   |
| Mouth N(%)                   | N/A       | 6(13.9%)   |
| Other (N%)                   | N/A       | 9(20.9%)   |
| <b>Pathological Staging</b>  |           |            |
| TX N(%)                      | N/A       | 11(25.6%)  |
| T0 N(%)                      | NA        | 1(2.33%)   |
| T1-T2 N(%)                   | NA        | 10(23.3%)  |
| T3-T4A N(%)                  | NA        | 21(48.8%)  |
| <b>Pathological Node</b>     |           |            |
| NX N(%)                      | N/A       | 12(27.9%)  |
| N0 N(%)                      | N/A       | 11(25.6%)  |
| N1-N2 N(%)                   | N/A       | 10(23.2%)  |
| N2A-N2C N(%)                 | N/A       | 4(9.3%)    |
| N3-N3B N(%)                  | N/A       | 6 (14%)    |
| <b>Tobacco Use</b>           |           |            |
| Yes N(%)                     | 6(25%)    | 22(51.2%)  |
| No N(%)                      | 13(54.2%) | 7(16.3%)   |
| Former N(%)                  | 5(20.8%)  | 14(32.5%)  |
| <b>ETOH use</b>              |           |            |
| Never N(%)                   | 1(4.2%)   | 0(0%)      |
| Yes N(%)                     | 13(54.2%) | 28(65.1%)  |
| No N(%)                      | 8(33.3%)  | 7(16.3%)   |
| Occasional N(%)              | 0(0%)     | 8(18.6%)   |
| Former N(%)                  | 2(8.3%)   | 0(0%)      |

**Supplementary Table 2: Clinical characteristics of prospective patient cohort for spectral flow cytometry and protein validation (Cohort 2)**

|                              | HNSCC     |
|------------------------------|-----------|
|                              | N=50      |
| <b>Demographics</b>          |           |
| Median Age                   | 60(37-82) |
| Sex N (%) Female             | 6(12%)    |
| <b>Tumor p16 Status</b>      |           |
| p16+ N (%)                   | 25(50%)   |
| p16- N (%)                   | 25(50%)   |
| NE N (%)                     | 0(0%)     |
| <b>Site of primary tumor</b> |           |
| Tonsil N(%)                  | 25(50%)   |
| Tongue N(%)                  | 4(8%)     |
| Base of Tongue N(%)          | 21(42%)   |
| Larynx N(%)                  | 0(0%)     |
| Other N(%)                   | 0(0%)     |
| <b>Pathological Staging</b>  |           |
| TX N(%)                      | 0(0%)     |
| T0 N(%)                      | 0(0%)     |
| T1-T2 N(%)                   | 34(68%)   |
| T3-T4 N(%)                   | 12(24%)   |
| Unknown N(%)                 | 4(8%)     |
| <b>Pathological Node</b>     |           |
| NX N(%)                      | 0(0%)     |
| N0 N(%)                      | 12(24%)   |
| N1-N2 N(%)                   | 15(30%)   |
| N2A-N2C N(%)                 | 18(72%)   |
| N3-N3B N(%)                  | 0(0%)     |
| Unknown N(%)                 | 5(10%)    |
| <b>Tobacco Use</b>           |           |
| Yes N(%)                     | 23(46%)   |
| No N(%)                      | 6(12%)    |
| Former N(%)                  | 14(28%)   |
| Unknown N(%)                 | 7(14%)    |
| <b>ETOH use</b>              |           |
| Never N(%)                   | 0(0%)     |
| Yes N(%)                     | 27(54%)   |
| No N(%)                      | 8(16%)    |
| Occasional N(%)              | 2(4%)     |
| Former N(%)                  | 3(6%)     |
| Unknown N(%)                 | 10(20%)   |

**Supplementary Table 3: Clinical characteristics of retrospective patient cohort for IHC and TLS analysis (Cohort 3)**

| Panel 1        |            |                                                    | Panel 3       |                |             |                                                                |                   |
|----------------|------------|----------------------------------------------------|---------------|----------------|-------------|----------------------------------------------------------------|-------------------|
| VENDOR         | CAT#       | ANTIBODY/DYE                                       | CLONE         | VENDOR         | CAT#        | ANTIBODY/DYE                                                   | CLONE             |
| BD bioscience  | 741136     | BUV496 Mouse Anti-Human CD7                        | (M-T701)      | Biologend      | 302262      | Brilliant Violet 750™ anti-human CD19 Antibody                 | (H1B19)           |
| BD bioscience  | 748443     | BUV563 Mouse Anti-Human CD268 (BAFF Receptor)      | (11C1)        | ThermoFisher   | 62-0209-42  | CD20 Monoclonal Antibody Super Bright 436, eBioscience™        | (2H7)             |
| BD bioscience  | 751138     | BUV615 Mouse Anti-Human CD38                       | (H1T2)        | Biologend      | 348224      | Pacific Blue™ anti-human IgD Antibody                          | (IA6-2)           |
| BD bioscience  | 751680     | BUV661 Mouse Anti-Human CD27                       | (O323)        | BD bioscience  | 566146      | BD Horizon™ BV480 Mouse Anti-Human IgM                         | (G20-127)         |
| BD bioscience  | 741858     | BUV737 Mouse Anti-Human IgG                        | (G18-145)     | Biologend      | 302825      | Brilliant Violet 570™ anti-human CD27 Antibody                 | (O323)            |
| BD bioscience  | 742007     | BUV805 Mouse Anti-Human CD19                       | (H1B19)       | BD bioscience  | 740414      | BV605 Mouse Anti-Human CD23                                    | (M-L233)          |
| Biologend      | 366314     | APC/Fire™ 750 anti-human CD18 Antibody             | (CBR LFA-1/2) | Biologend      | 305440      | Brilliant Violet 711™ anti-human CD86 Antibody                 | (IT2.2)           |
| Biologend      | 362906     | Alexa Fluor® 488 anti-human CD191 (CCR1) Antibody  | (5F10B29)     | Biologend      | 306526      | PE/Dazzle™ 594 anti-human CD184 (CXCR4) Antibody               | (12G5)            |
| BD bioscience  | 742397     | BD OptiBuild™ BV421 Mouse Anti-Human CD37          | (M-B371)      | ThermoFisher   | 46-9753-41  | PerCP/EF710 anti-human SEMA4A                                  | (clone 5E3)       |
| BD bioscience  | 746638     | BV480 Mouse Anti-Human CD54 (ICAM-1)               | (HA58)        | Biologend      | 340304      | PE anti-human CD307e (FcRL5) Antibody                          | (509R)            |
| BD bioscience  | 743625     | BD OptiBuild™ BV510 Mouse Anti-Human CD180         | (G28-8)       | Biologend      | 340202      | Purified anti-human CD307d (FcRL4) Antibody                    | (413D12)          |
| BD bioscience  | 743796     | BD OptiBuild™ BV605 Mouse Anti-Human CD72          | (J4-117)      | Biologend      | 304010      | PE/Cyanine5 anti-human CD45 Antibody                           | (H130)            |
| BD bioscience  | 563922     | BD Horizon™ BV650 Mouse Anti-Human CD196 (CCR6)    | (11A9)        | Biologend      | 342804      | PerCP/Cyanine5.5 anti-human CD305 (LAIR1) Antibody             | (NKT2A55)         |
| BD bioscience  | 747484     | BD OptiBuild™ BV750 Mouse Anti-Human IgD           | (IA6-2)       | BD bioscience  | 565156      | BD Horizon™ BB515 Mouse Anti-Human CD70                        | (Ki-24)           |
| BD bioscience  | 740969     | BD OptiBuild™ BV786 Mouse Anti-Human CD21          | (B-Iy4)       | Biologend      | 310932      | Brilliant Violet 785™ anti-human CD69 Antibody                 | (FN50)            |
| BD bioscience  | 551058     | PE-Cy™5 Mouse Anti-Human CD83                      | (HB15e)       | BD bioscience  | 740570      | BV650 Mouse Anti-Human CD22                                    | (H1B22)           |
| BD bioscience  | 564071     | BUV395 Mouse Anti-Ki-67                            | (B56)         | Biologend      | 307620      | Alexa Fluor® 488 anti-human HLA-DR Antibody                    | (L243)            |
| ThermoFisher   | 46-9753-41 | PerCP/EF710 anti-human SEMA4A                      | (clone 5E3)   | Biologend      | 356518      | Brilliant Violet 510™ anti-human CD138 (Syndecan-1) Antibody   | (MI15)            |
| Biologend      | 305406     | PE anti-human CD86 Antibody                        | (IT2.2)       | BD bioscience  | 566670      | Alexa Fluor® 647 Mouse Anti-Human VISTA                        | (MIH65)           |
| BD bioscience  | 563582     | PE-Cy™7 Mouse Anti-Bcl-6                           | (K112-91)     | Biologend      | 356608      | PE/Cyanine7 anti-human CD38 Antibody                           | (HB-7)            |
| Biologend      | 302332     | Brilliant Violet 570™ anti-human CD20 Antibody     | (2H7)         | <b>Panel 4</b> |             |                                                                |                   |
| Biologend      | 300330     | Pacific Blue™ anti-human CD3 Antibody              | (H1T3a)       | BD biosciences | 565972      | BD Horizon™ BUV395 Mouse Anti-Human HLA-DR                     | (G46-6)           |
| Biologend      | 340306     | APC anti-human CD307e (FcRL5)                      | (509R)        | BD biosciences | 612757      | BD Horizon™ BUV737 Mouse Anti-Human CD19                       | (SJ25C1)          |
| Biologend      | 334328     | Alexa Fluor® 700 anti-human CD40                   | (5C3)         | Biologend      | 305432      | Brilliant Violet 510™ anti-human CD86 Antibody                 | (IT2.2)           |
| BD bioscience  | 752351     | BD OptiBuild™ BUV615 Mouse Anti-Human CD38         | (HB7)         | Biologend      | 302828      | Brilliant Violet 650™ anti-human CD27 Antibody                 | (O323)            |
| <b>Panel 2</b> |            |                                                    |               | Biologend      | 329722      | Brilliant Violet 711™ anti-human CD274 (B7-H1, PD-L1) Antibody | (29E 2A3)         |
| Biologend      | 302262     | Brilliant Violet 750™ anti-human CD19 Antibody     | (H1B19)       | Biologend      | 310932      | Brilliant Violet 785™ anti-human CD69 Antibody                 | (FN50)            |
| Biologend      | 302332     | Brilliant Violet 570™ anti-human CD20 Antibody     | (2H7)         | Biologend      | 354906      | APC anti-human CD21 Antibody                                   | (Bu32)            |
| Biologend      | 354920     | APC/Fire™ 750 anti-human CD21 Antibody             | (Bu32)        | Biologend      | 334328      | Alexa Fluor® 700 anti-human CD40 Antibody                      | (5C3)             |
| Biologend      | 302828     | Brilliant Violet 650™ anti-human CD27 Antibody     | (O323)        | Biologend      | 356604      | PE anti-human CD38 Antibody                                    | (HB-7)            |
| Biologend      | 348224     | Pacific Blue™ anti-human IgD Antibody              | (IA6-2)       | ThermoFisher   | 61-2799-42  | CD279 (PD-1) Monoclonal Antibody PE-eFluor 610                 | (eBioJ105 (J105)) |
| BD bioscience  | 566146     | BD Horizon™ BV480 Mouse Anti-Human IgM             | (G20-127)     | Biologend      | 356513      | PE/Cyanine7 anti-human CD138 (Syndecan-1) Antibody             | (MI15)            |
| Biologend      | 340304     | PE anti-human CD307e (FcRL5) Antibody              | (509R)        | Biologend      | 302326      | PerCP/Cyanine5.5 anti-human CD20 Antibody                      | (2H7)             |
| Biologend      | 340202     | Purified anti-human CD307d (FcRL4) Antibody        | (413D12)      | Miltenyi       | 130-113-475 | FITC anti-human IgA                                            | (IS11-8E10)       |
| Biologend      | 328214     | Brilliant Violet 421™ anti-human CD39 Antibody     | (A1)          | <b>Panel 5</b> |             |                                                                |                   |
| BD bioscience  | 563198     | BV510 Mouse Anti-Human CD73                        | (AD2)         | BD biosciences | 741823      | BD OptiBuild™ BUV737 Mouse Anti-Human CD4                      | (RPA-T4)          |
| Biologend      | 644835     | Brilliant Violet 785™ anti-T-bet Antibody          | (4B10)        | BD biosciences | 563795      | BD Horizon™ BUV395 Mouse Anti-Human CD8                        | (RPA-T8)          |
| Biologend      | 301614     | APC anti-human CD11c Antibody                      | (clone 3.9)   | Biologend      | 644820      | Brilliant Violet 711™ anti-T-bet Antibody                      | (4B10)            |
| BD bioscience  | 565153     | BB515 Mouse Anti-Human LAIR-1 (CD305)              | (DX26)        | BD biosciences | 563582      | BD Pharmingen™ PE-Cy™7 Mouse Anti-Bcl-6                        | (K112-91)         |
| Biologend      | 307621     | Alexa Fluor® 647 anti-human HLA-DR Antibody        | (L243)        | Biologend      | 356928      | PE/Dazzle™ 594 anti-human CD185 (CXCR5) Antibody               | (J252D4)          |
| Biologend      | 334328     | Alexa Fluor® 700 anti-human CD40 Antibody          | (5C3)         | ThermoFisher   | 48-4776-42  | FOXP3 Monoclonal Antibody eFluor 450, eBioscience™             | (PCH101)          |
| Biologend      | 306526     | PE/Dazzle™ 594 anti-human CD184 (CXCR4) Antibody   | (12G5)        | Biologend      | 302828      | Brilliant Violet 650™ anti-human CD27 Antibody                 | (O323)            |
| Biologend      | 305440     | Brilliant Violet 711™ anti-human CD86 Antibody     | (IT2.2)       | <b>Panel 6</b> |             |                                                                |                   |
| Biologend      | 355641     | Brilliant Violet 605™ anti-human CD38 Antibody     | (HB-7)        | Biologend      | 300514      | APC anti-human CD4 Antibody                                    | (RPA-T4)          |
| Biologend      | 356513     | PE/Cyanine7 anti-human CD138 (Syndecan-1) Antibody | (MI15)        | Biologend      | 301012      | PE/Cyanine7 anti-human CD8a Antibody                           | (RPA-T8)          |
| BD bioscience  | 612856     | BD Horizon™ BUV737 Mouse Anti-Human CD70           | (Ki-24)       | Biologend      | 644810      | PE anti-T-bet Antibody                                         | (4B10)            |
| BD bioscience  | 744103     | BD OptiBuild™ BUV395 Mouse Anti-Human CD178        | (NOK1)        | ThermoFisher   | 48-4776-42  | FOXP3 Monoclonal Antibody eFluor 450, eBioscience™             | (PCH101)          |
| Biologend      | 356912     | Alexa Fluor® 488 anti-human CD185 (CXCR5) Antibody | (J252D4)      | Biologend      | 356928      | PE/Dazzle™ 594 anti-human CD185 (CXCR5) Antibody               | (J252D4)          |

Supplementary Table 4: Flow cytometry antibody panels

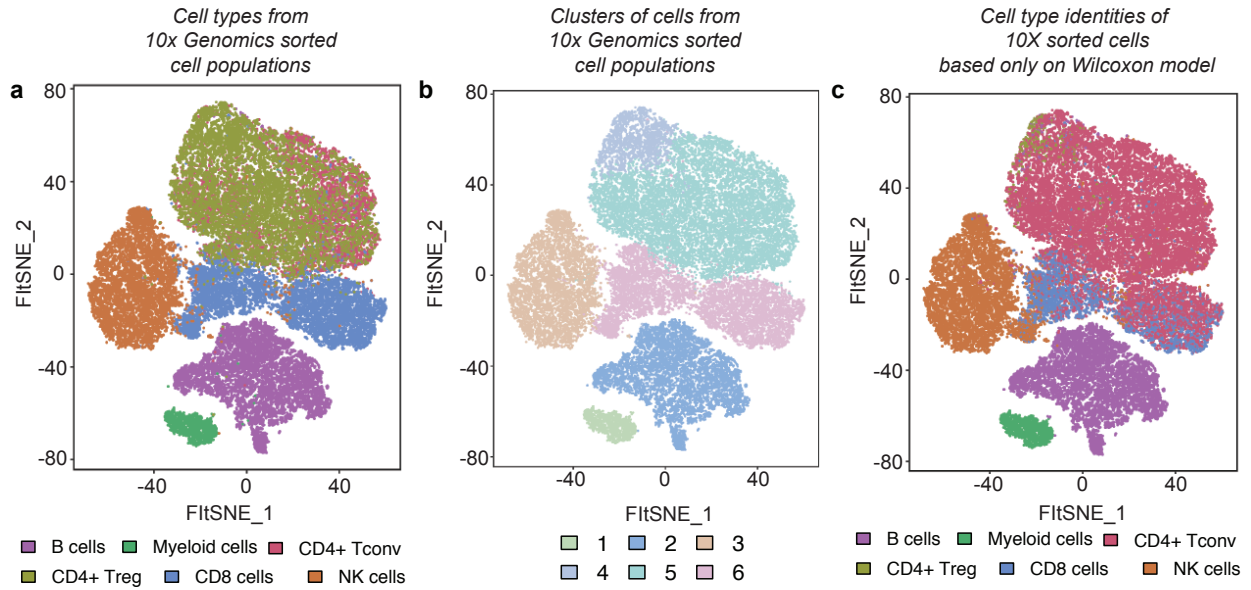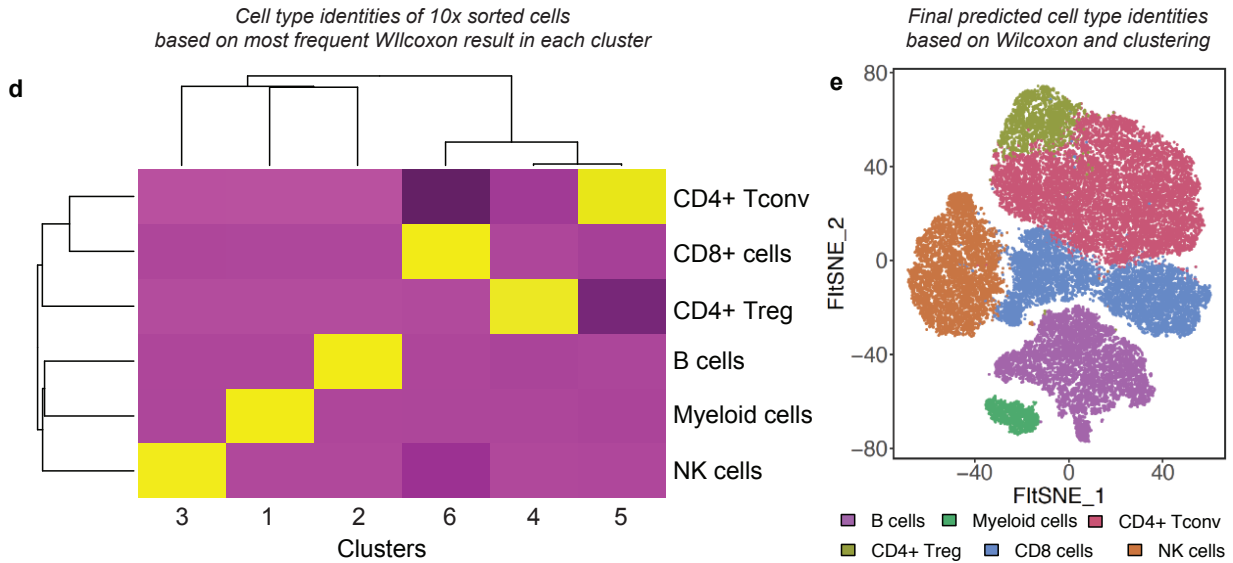

**f** Metrics of cell type predictions from Wilcoxon and clustering model using sorted cells from 10X Genomics

|                      | B cells | Myeloid cells | CD4+ Tconv | CD4+ Treg | CD8+ cells | NK cells |
|----------------------|---------|---------------|------------|-----------|------------|----------|
| Sensitivity          | 1.000   | 0.987         | 0.976      | 0.928     | 0.990      | 0.985    |
| Specificity          | 0.999   | 1.000         | 1.000      | 1.000     | 0.981      | 0.997    |
| Pos Pred Value       | 0.997   | 0.996         | 1.000      | 1.000     | 0.926      | 0.987    |
| Neg Pred Value       | 1.000   | 1.000         | 0.987      | 0.995     | 0.998      | 0.997    |
| Prevalence           | 0.191   | 0.032         | 0.354      | 0.068     | 0.194      | 0.161    |
| Detection Rate       | 0.191   | 0.031         | 0.346      | 0.063     | 0.192      | 0.158    |
| Detection Prevalence | 0.192   | 0.031         | 0.346      | 0.063     | 0.208      | 0.161    |
| Balanced Accuracy    | 1.000   | 0.993         | 0.988      | 0.964     | 0.986      | 0.991    |

**Supplementary Fig. 1: Validation of a combination Wilcoxon rank sum test and clustering based method for identification of cell types.** Publicly available data from sorted populations of immune cells was combined, and a classification algorithm was employed to identify cell types. **a.** FltSNE plot of combined purified B cells, CD14+ monocytes, CD4+ helper T cells, CD4+ Treg, CD8+ T cells, and CD4+ regulatory T cells. **b.** Same FltSNE plot as (a), but showing clustering results. Clusters were strongly associated with cell types of purified populations. CD4+ Treg, despite overlapping with CD4+ Tconv as a purified population, were strongly associated with cluster 5, suggesting that the sorted population of CD4+ Treg were mixed with CD4+ Tconv. **c.** Raw results from testing of the Wilcoxon rank sum from known cell populations. Individual cells were scored for enrichment of markers associated with each purified cell population. Some clusters were readily identifiable as pure populations using just the Wilcoxon based enrichment, but mixtures of T cells were evident. **d.** Heatmap showing the association between inferred lineage type from the Wilcoxon rank sum scores and the clusters. Each cluster largely consisted of a major lineage when looking at the aggregate Wilcoxon rank sum test across clusters. **e.** Inferred cell types based on the association between Wilcoxon scores and clusters from (d). Cell type inference agreed strongly with results of clustering from (b). **f.** Confusion matrix comparing the inferred cell types to the ground truth. The sensitivity, specificity, and accuracy were between 0.93 and 1.0 for all lineages. Samples were derived from one blood donor for analysis.

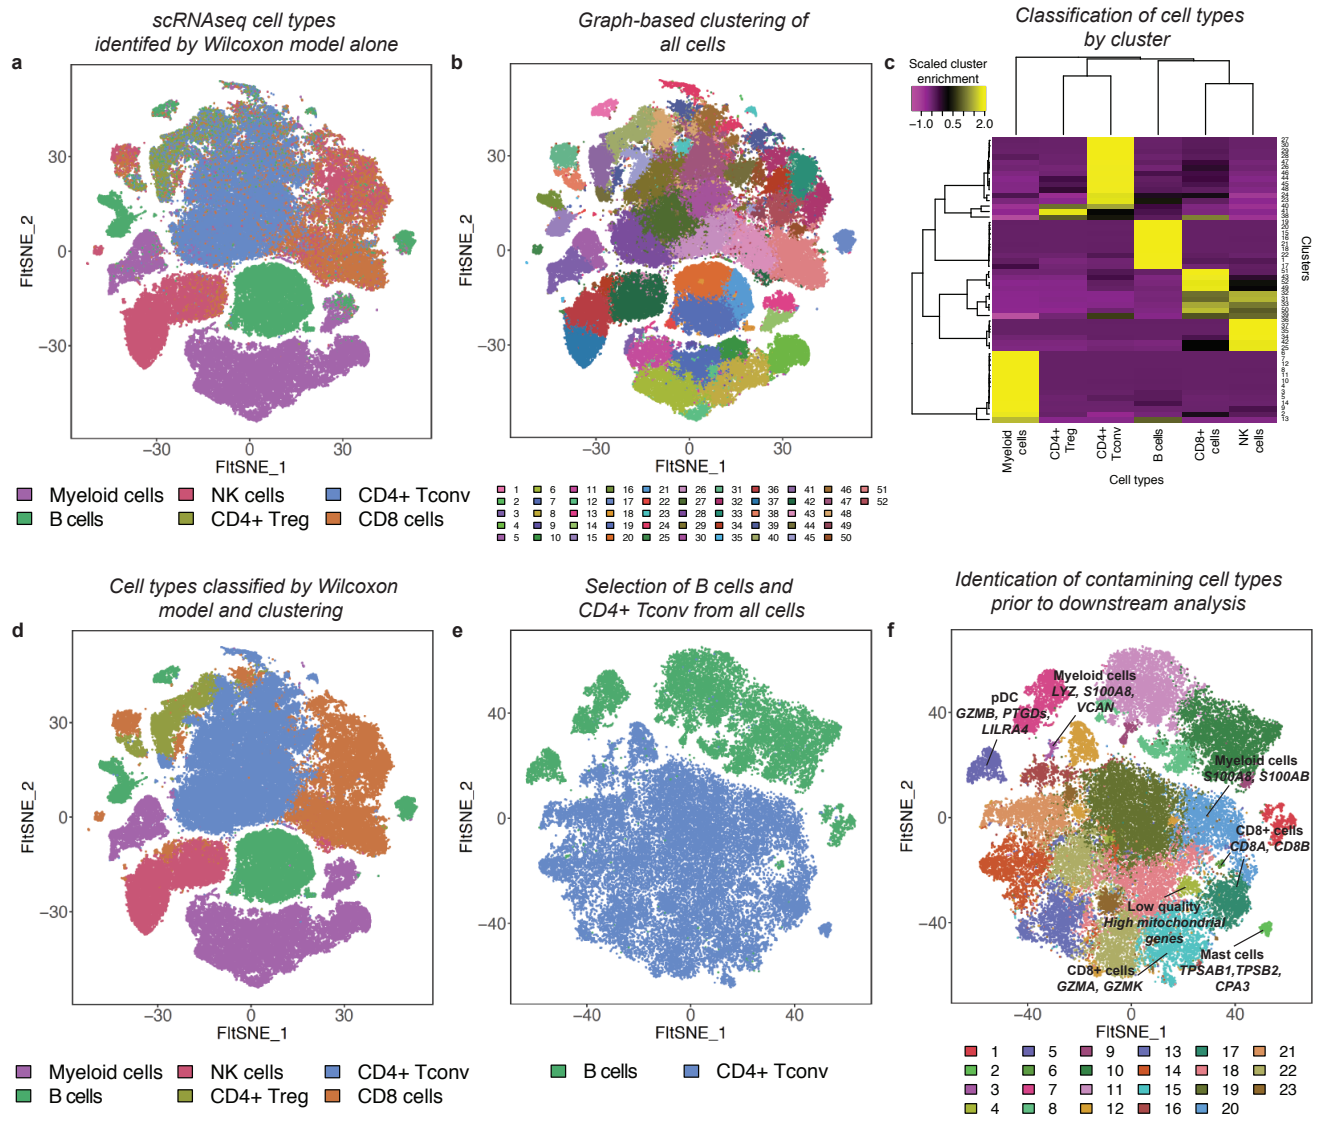

**Supplementary Fig. 2: Identification of cell types from patients and controls using the combination Wilcoxon rank sum test and clustering based approach.**

**a.** Raw results from the Wilcoxon scores derived for each individual cell. Certain populations are highly accurately inferred from this first step, while others exhibit mixtures of cell types. **b.** Results of Louvian clustering revealed a total of 52 clusters from all the cells in the dataset. **c.** Heatmap showing the relationship between cluster and inferred cell types from (a) and (b). **d.** Results of the combination of Wilcoxon scoring and cluster association from (a-c). Major

lineages are grouped together in FltSNE space, allowing the isolation of B cells and CD4+ Tconv for downstream analysis. **e.** B cells and CD4+ Tconv were bioinformatically isolated from D) and were projected in a new FltSNE space and colored by their inferred cell types. **f.** Identities of cell clusters were cross-checked by investigating differentially expressed genes across lineages. Contaminating lineages (i.e. those that are not B or CD4+ Tconv) and cell types that were not present in the training dataset (e.g. plasmacytoid dendritic cells [pDC], mast cells) were identified and removed, leaving only highly purified B and CD4+ Tconv for downstream analysis. Samples were derived from 6 healthy donors, 5 healthy tonsils, and 27 HNSCC patients.



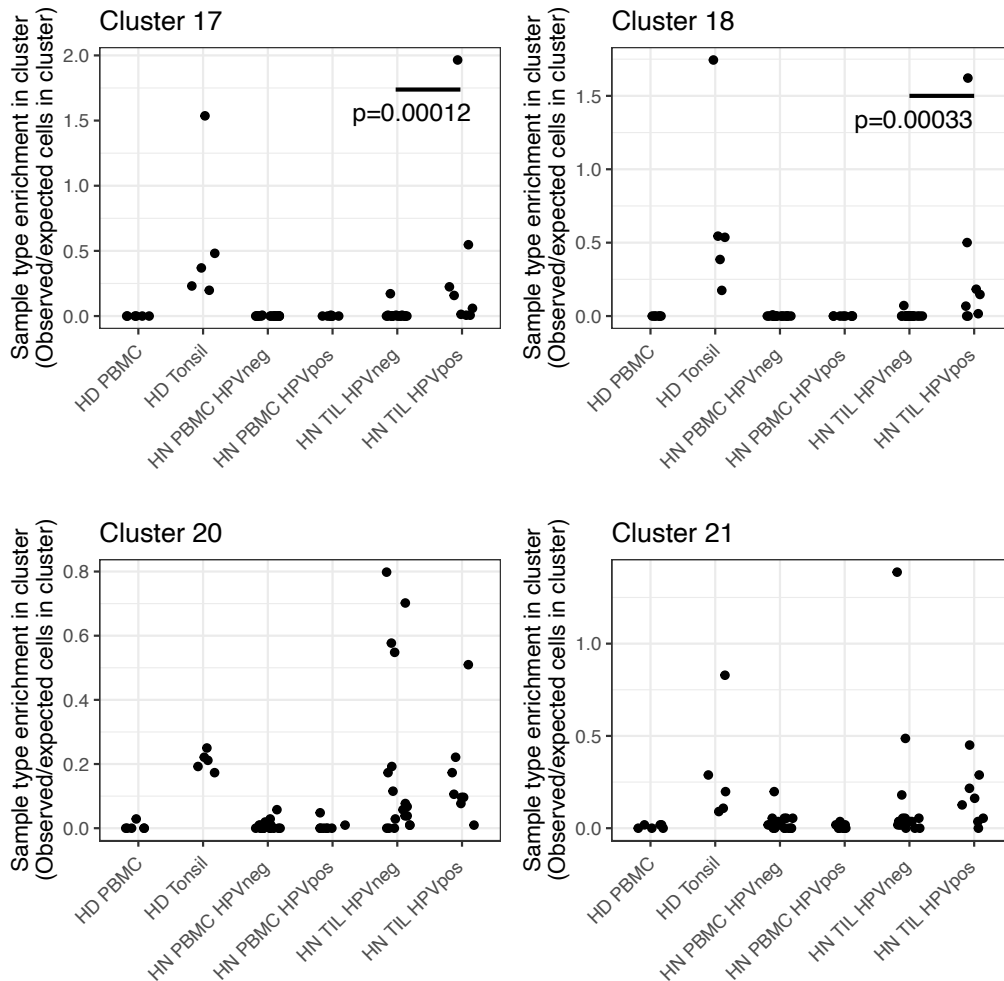

**Supplementary Fig. 3: Statistical assessment of observed versus expected number of cells in germinal center and plasma cell clusters.**

We first performed ANOVA tests to determine if there were differences between patient groups in a given cluster, and we found that clusters 17 ( $p=0.00033$ ), 18 ( $p<0.0001$ ) and 20 ( $p=0.0025$ ) had at least one group that was different, while cluster 21 did not ( $p=0.067$ ). Within clusters 17, 18 and 20 we tested whether there was any difference between TIL samples from HPV- versus HPV+ patients by Wilcoxon rank sum test and found that there were significantly higher frequencies of germinal center B cells in clusters 17 and 18. There was no difference between HPV- versus HPV+ patients in for plasma cells in cluster 20. Source data are provided as a Source Data file. Samples were derived from 6 healthy blood donors, 5 healthy tonsils and 27

HNSCC patients.

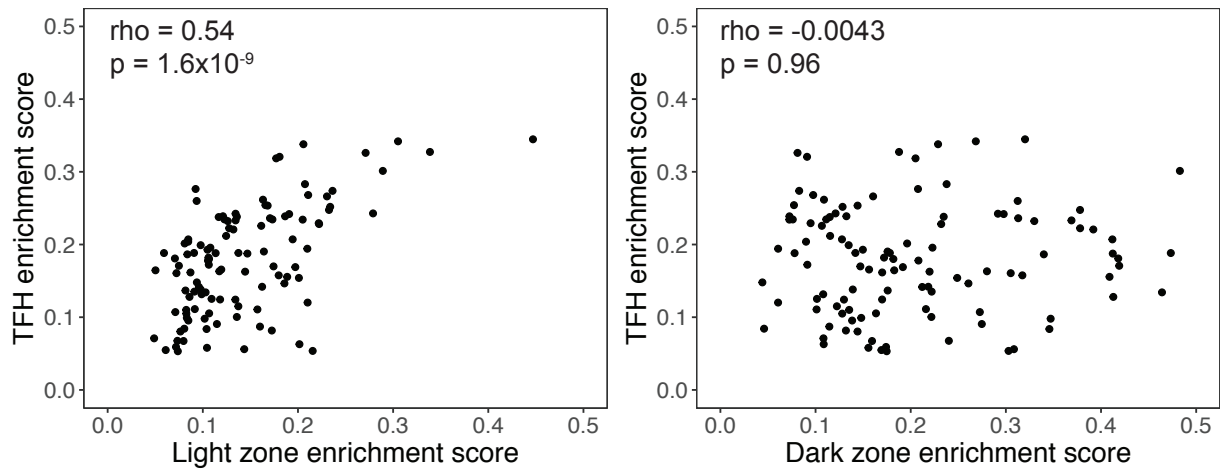

**Supplementary Fig. 4. Relationship between germinal center cell states and TFH cells in samples from The Cancer Genome Atlas.**

Light zone B cells were significantly correlated with TFH cells (left panel), but there was no relationship between dark zone B cells and TFH cells (right panel). Spearman's correlation was used, and p values are two-tailed. Source data are provided as a Source Data file. Samples were derived from 111 patients from the TCGA.

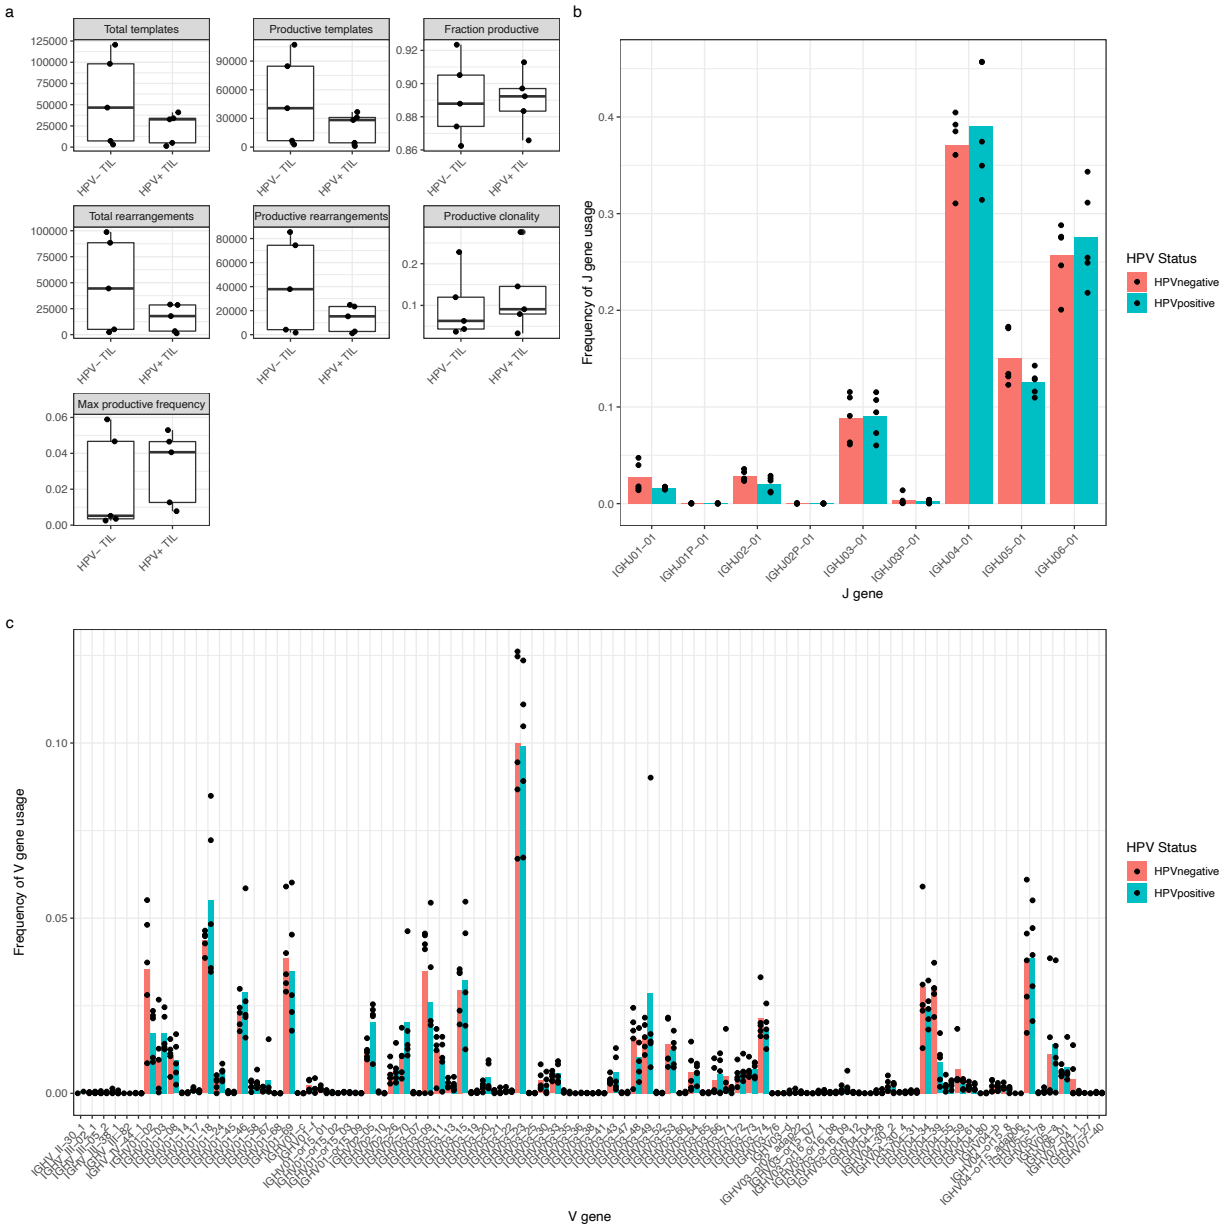

**Supplementary Fig. 5: Adaptive BCR sequencing reveals no difference in clonality or other metrics between HPV- and HPV+ TIL.**

**a.** There were no statistically significant differences by Wilcoxon rank sum test in BCR templates, rearrangements or clonality between HPV- and HPV+ TIL. BCR metrics were assessed from N=5 patients in each group. The line in the middle of the boxplot indicates the median, the top and bottom of the boxplot indicate the first and third quartiles, and the whiskers indicate 95% confidence intervals. **b.** There were no significant differences in J gene usage for

BCRs between HPV+ and HPV- TIL. J gene usage was assessed from N=5 patients in each group and compared by Wilcoxon rank sum test. **c.** There were no significant differences in V gene usage between BCRs from HPV- and HPV+ TIL. V gene usage was assessed from N=5 patients in each group and compared by Wilcoxon rank sum test. Source data are provided as a Source Data file.

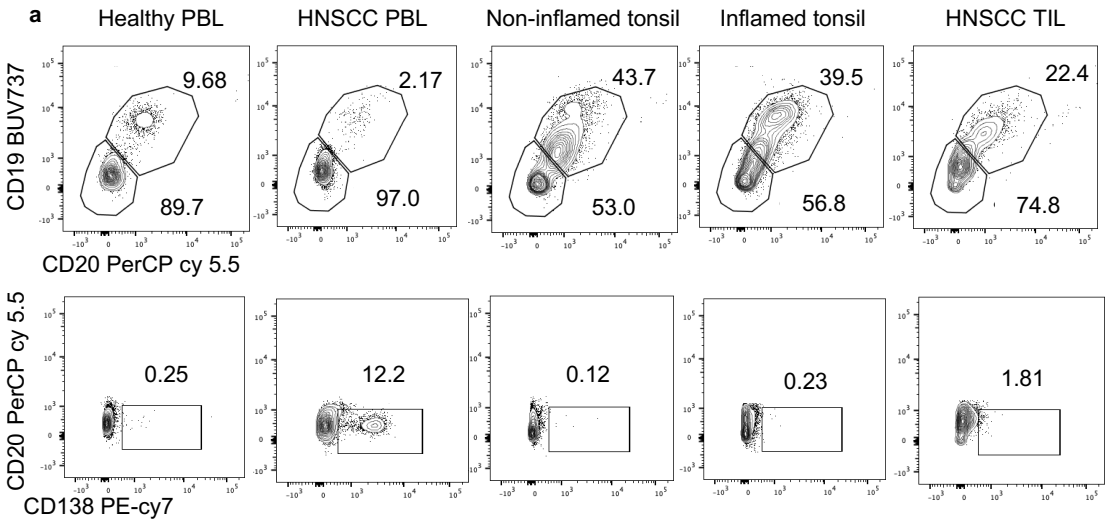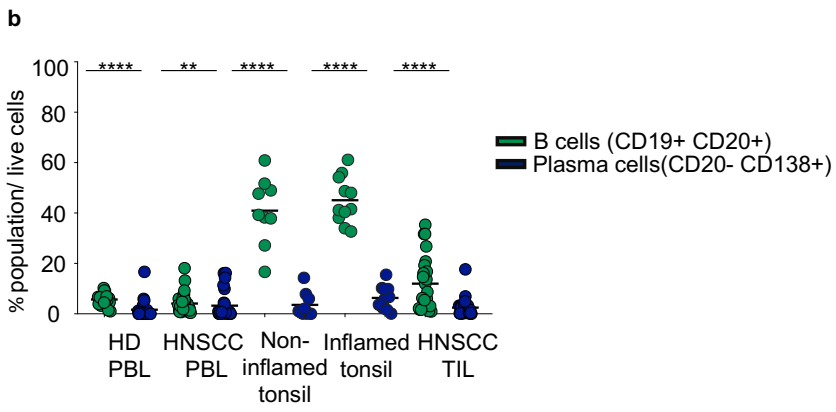

**Supplementary Fig. 6: B cells are significantly increased compared to plasma cells in HNSCC patients.**

a. Representative flow plots for quantification of B cell frequency compared to plasma cell frequency from a separate cohort of tonsils, healthy PBMCs, HNSCC TIL, and HNSCC PBMC.

b. Mean scatter plot showing the frequency of B cells compared to plasma cells in healthy PBL (n=22), non-inflamed tonsils (n=9), inflamed tonsil (n=11), HNSCC tumor (n=23), HNSCC PBMCs (n=30). Statistical analysis by Students Two-sided T-test (Mann-Whitney).

\*\*\*\*P=<0.0001, \*\*P=0.003. Source data are provided as a Source Data file.

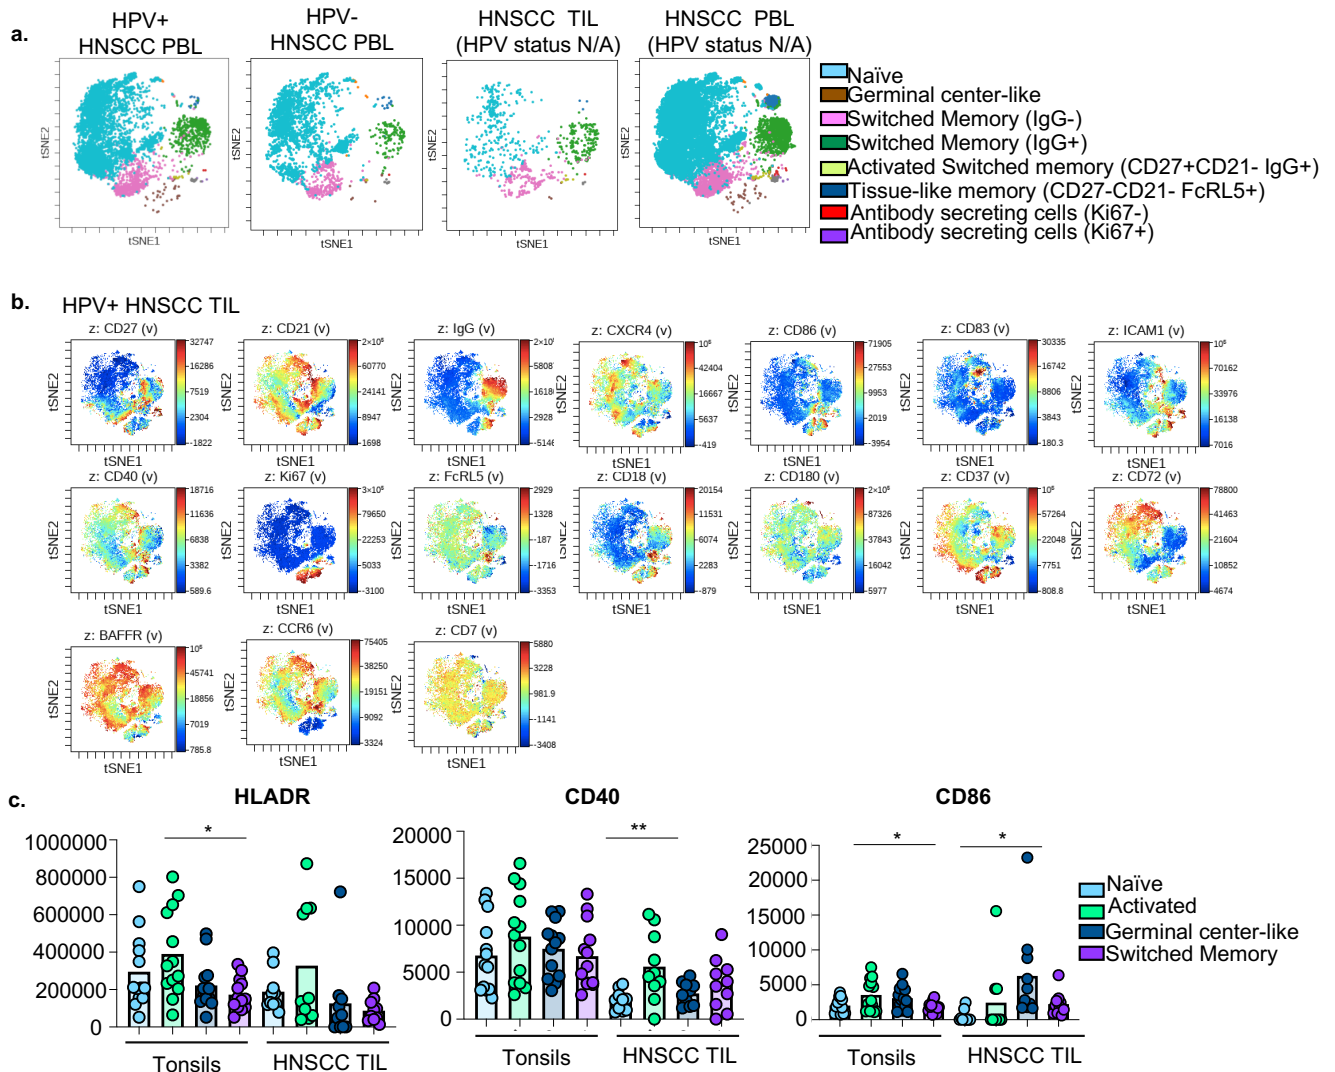

**Supplementary Fig. 7: Additional high dimensional analysis of HNSCC cohort 2.**

**a.** tSNE plots showing additional samples that were analyzed using Cytobank with patients from HNSCC cohort 2. Included were matched HPV+ (n=3) and HPV-PBMC (n=2). An additional set of HNSCC TIL (n=3) and PBL (n=14) were also included, however HPV status in these patients was not evaluated (HPV status N/A). **b.** Individual feature plots from HPV+ HNSCC patients demonstrating expression level of additional markers used to identify B cell subpopulations. **c.** Bar plot showing mean fluorescent intensity of HLADR, CD86, CD40 on B cell subsets. HNSCC TIL n=10 Tonsils n=13 Statistical analysis by one-way ANOVA followed by Tukeys multiple comparison. \*P=0.03, \*\*P=0.002. Source data are provided as a Source Data file

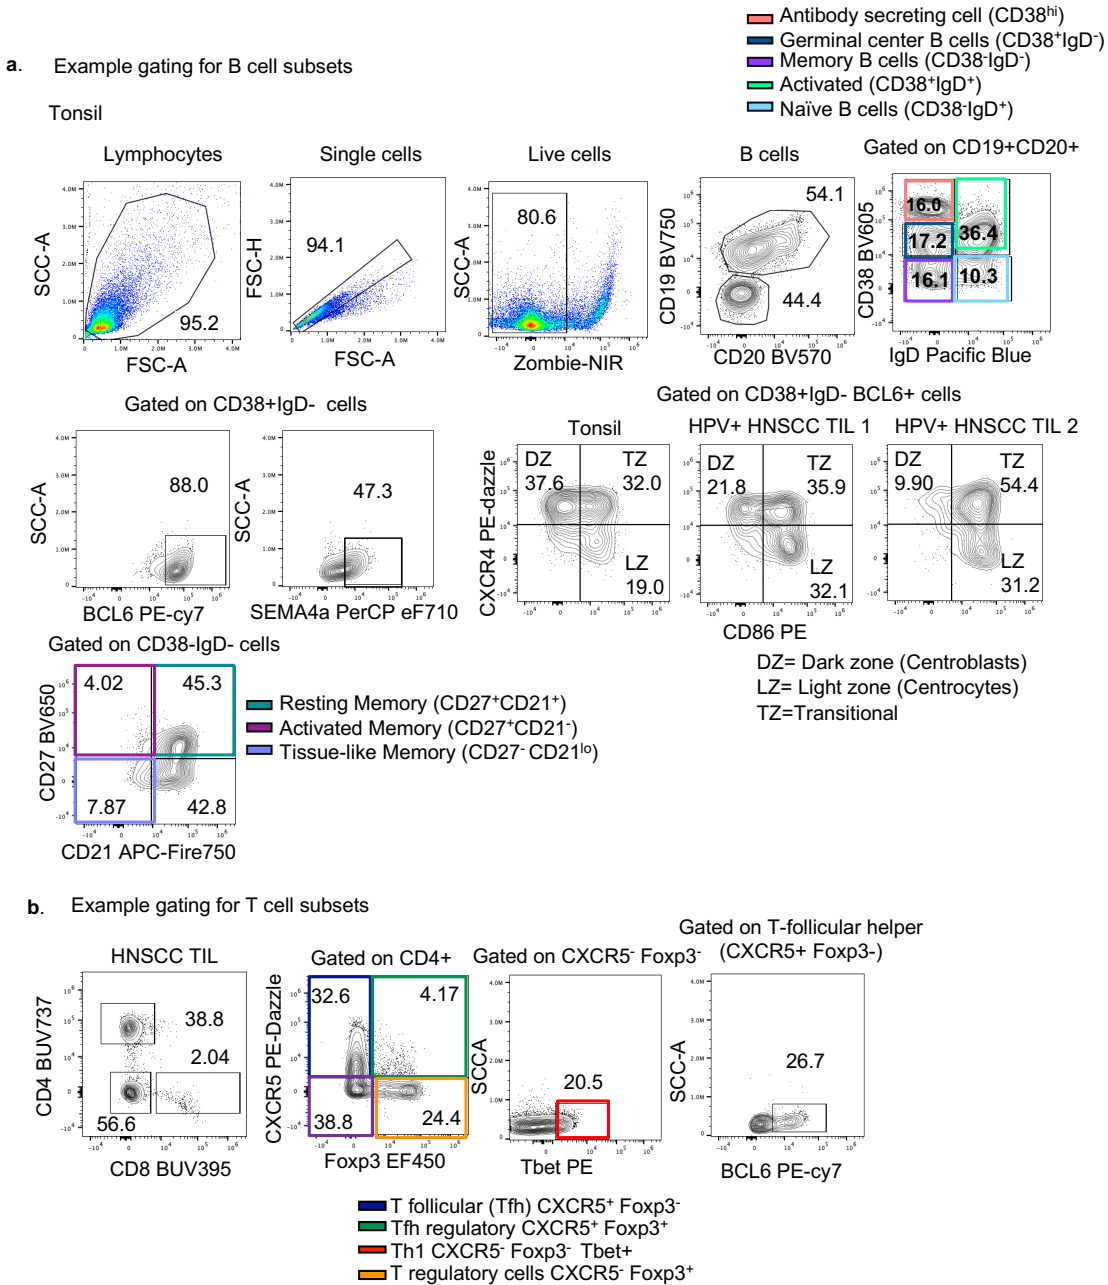

**Supplementary Fig. 8: Flow cytometry gating strategy for B cell and T cell profiling.**

**a.** Representative flow cytometry plots for analysis of samples stained with 25 parameter Cytex Aurora panel (**Fig. 2 and 4**). **b.** Representative flow cytometry plots for analysis of samples stained with T cell panel (**Fig. 2c**).

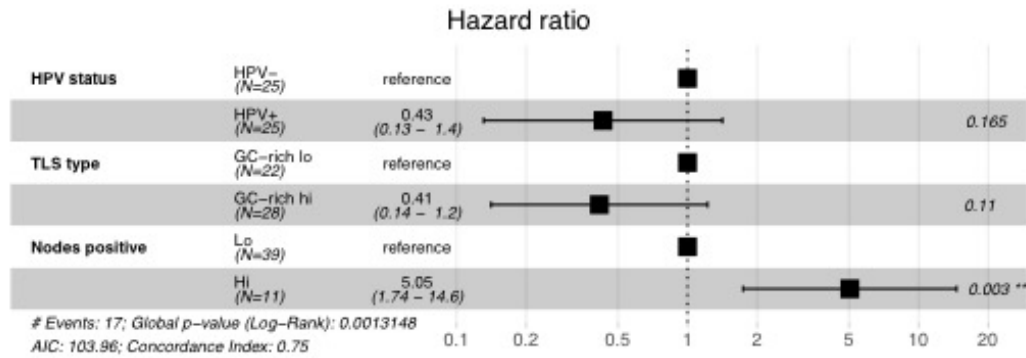

**Supplementary Fig. 9: Multivariate survival analysis for TLS, HPV status, and disease burden.**

Multivariate survival analysis based on HPV status, TLS type (i.e. either high TLS with GC or low TLS with GC) and disease burden as measured by the number of positive nodes. This multivariate analysis was significant with a log-rank p value of 0.0013; however, given the relatively small size of this dataset, neither the HPV status or TLS type were statistically significant after correcting for disease burden. Both HPV+ disease and high TLS with GC trended towards better outcomes. Source data are provided as a Source Data file. Samples were derived from 50 HNSCC patients.
