# Supplementary material for: B cell signatures and tertiary lymphoid structures contribute to outcome in head and neck squamous cell carcinoma
Source: PubMed Central journal article supplement (PMC8184766; doi:10.1038/s41467-021-23355-x), 2021-06-07
Supplement: 41467_2021_23355_MOESM2_ESM.pdf [file 41467_2021_23355_MOESM2_ESM.pdf]

## Descriptions of Additional Supplementary Files

### **Supplementary Data 1**

**Description:** Differentially expressed genes across major canonical immune cell types.

### **Supplementary Data 2**

**Description:** Differentially expressed genes across B cell and CD4+ Tconv clusters.

### **Supplementary Data 3**

**Description:** Functional enrichment of protein-protein interactions occurring during the differentiation of naïve B cells to GC B cells.

### **Supplementary Data 4**

**Description:** Raw BCR sequencing data from Adaptive
